# Supplementary material
Source: bioRxiv or medRxiv preprint supplement (http://medrxiv.stage.highwire.org/highwire/filestream/84118/field_highwire_adjunct_files/0/2020.06.01.20119297-1.pdf)

# Figure 1

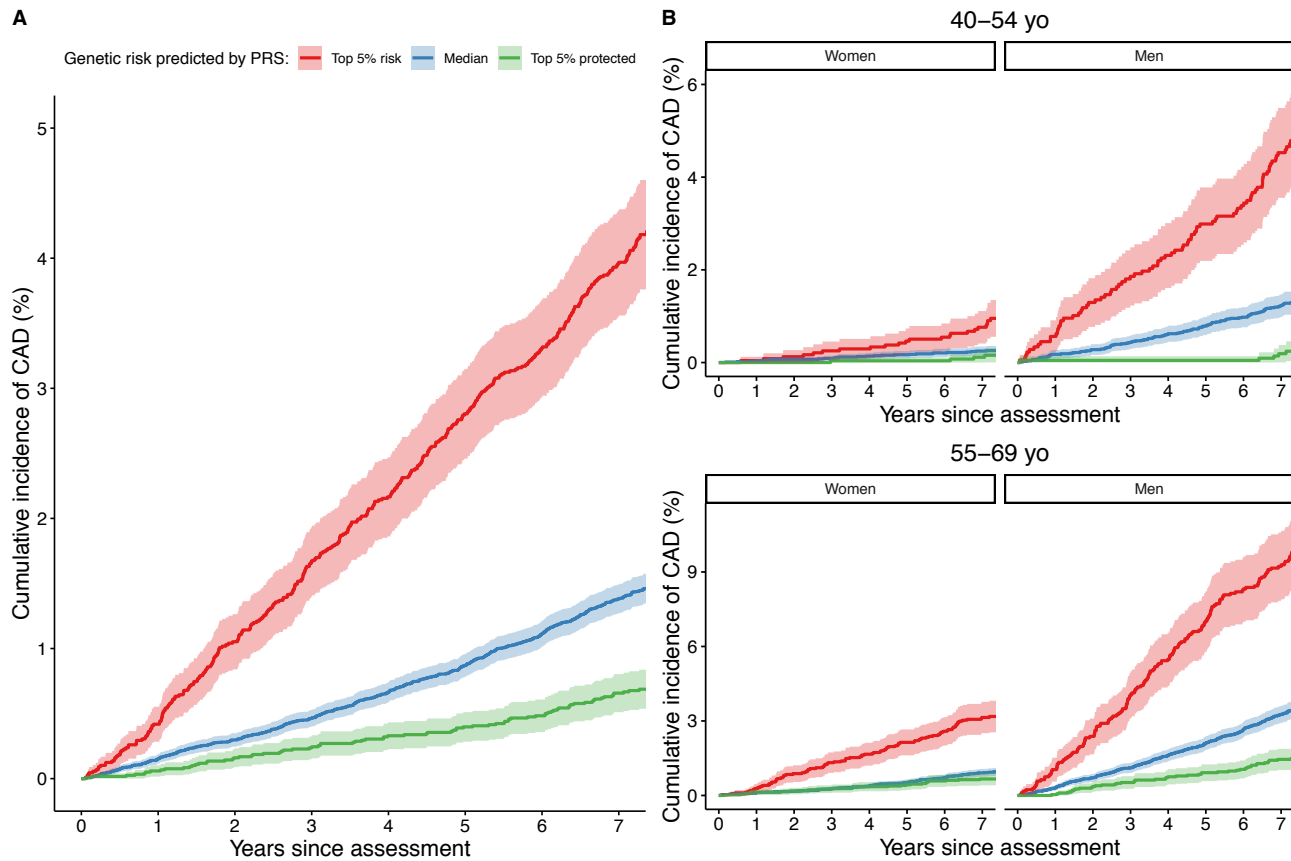

# Figure 2

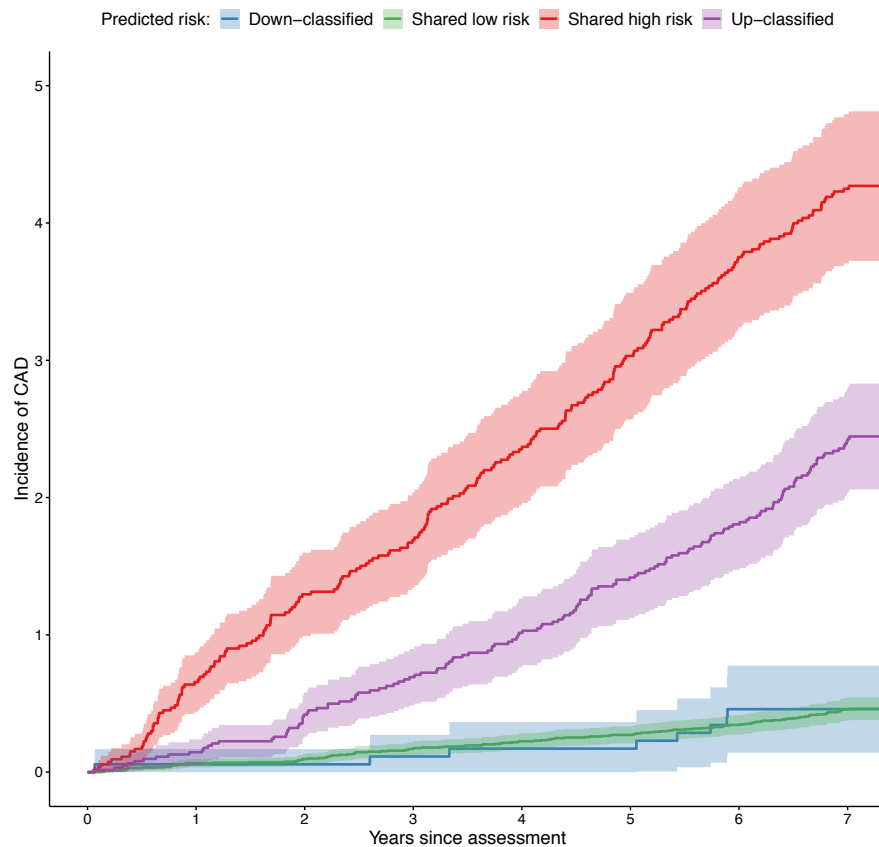

# Figure 3

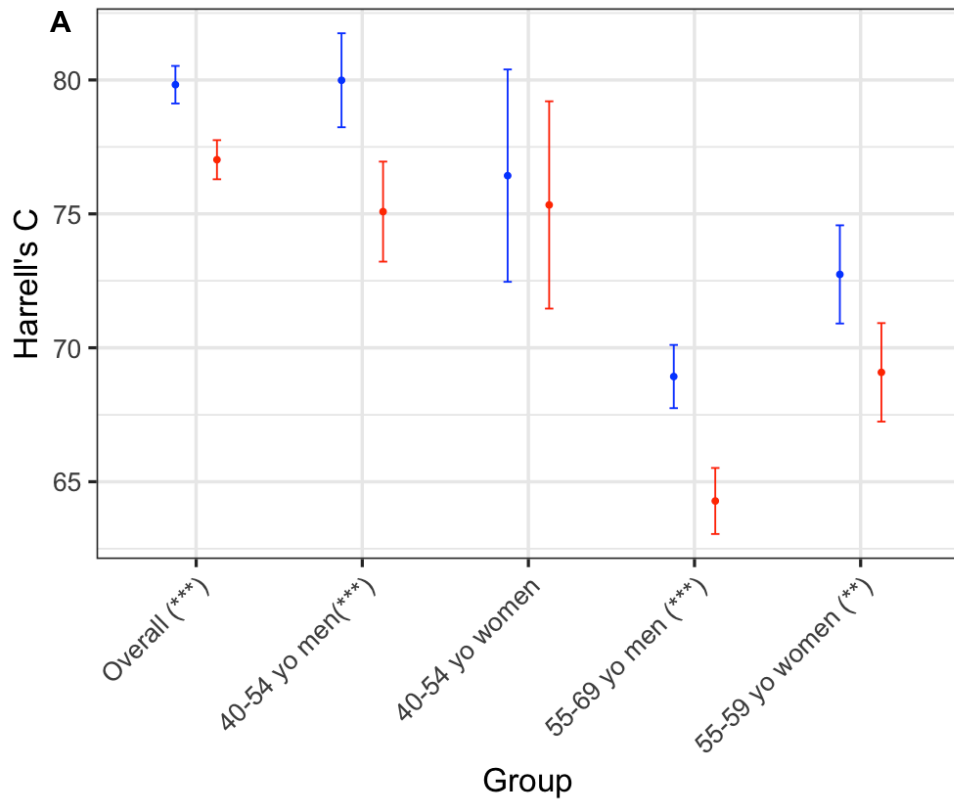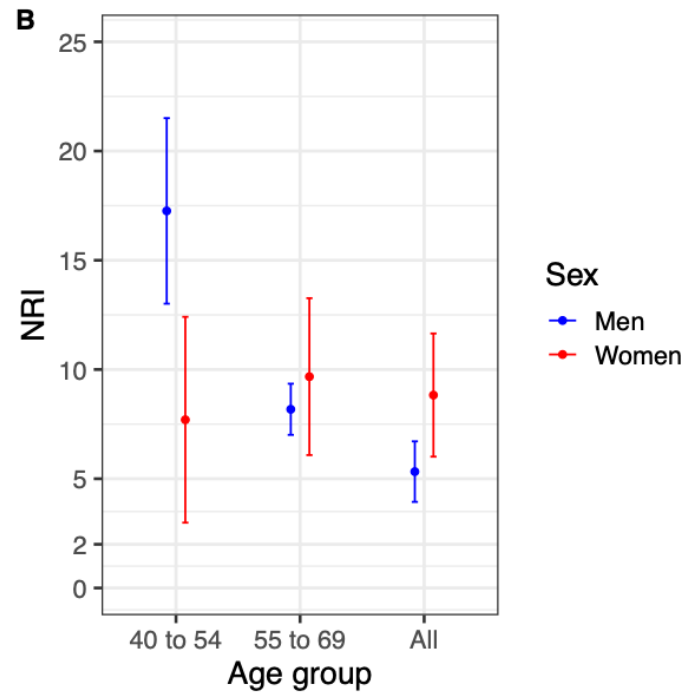

# Figure S1

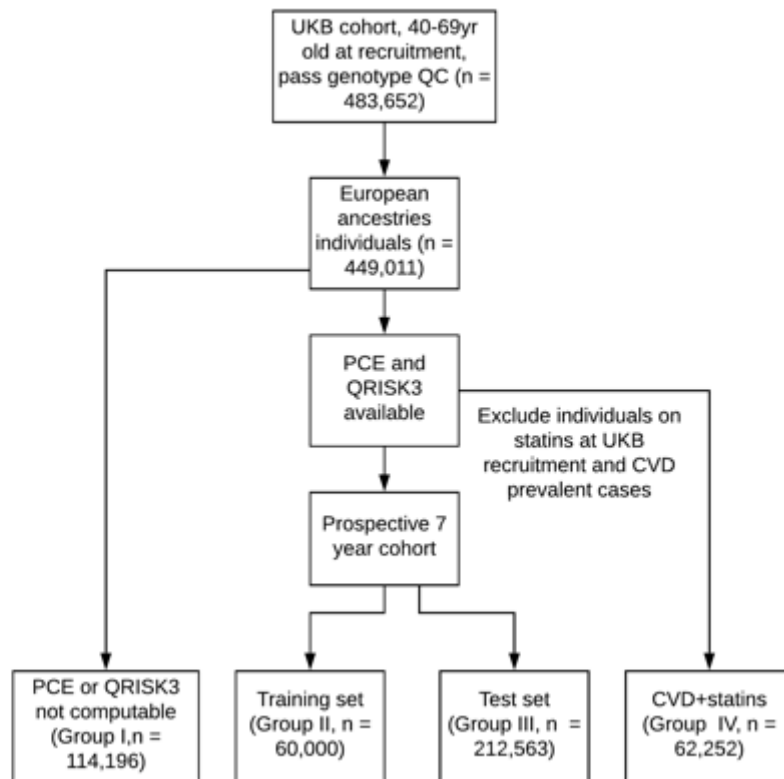

# Figure S2

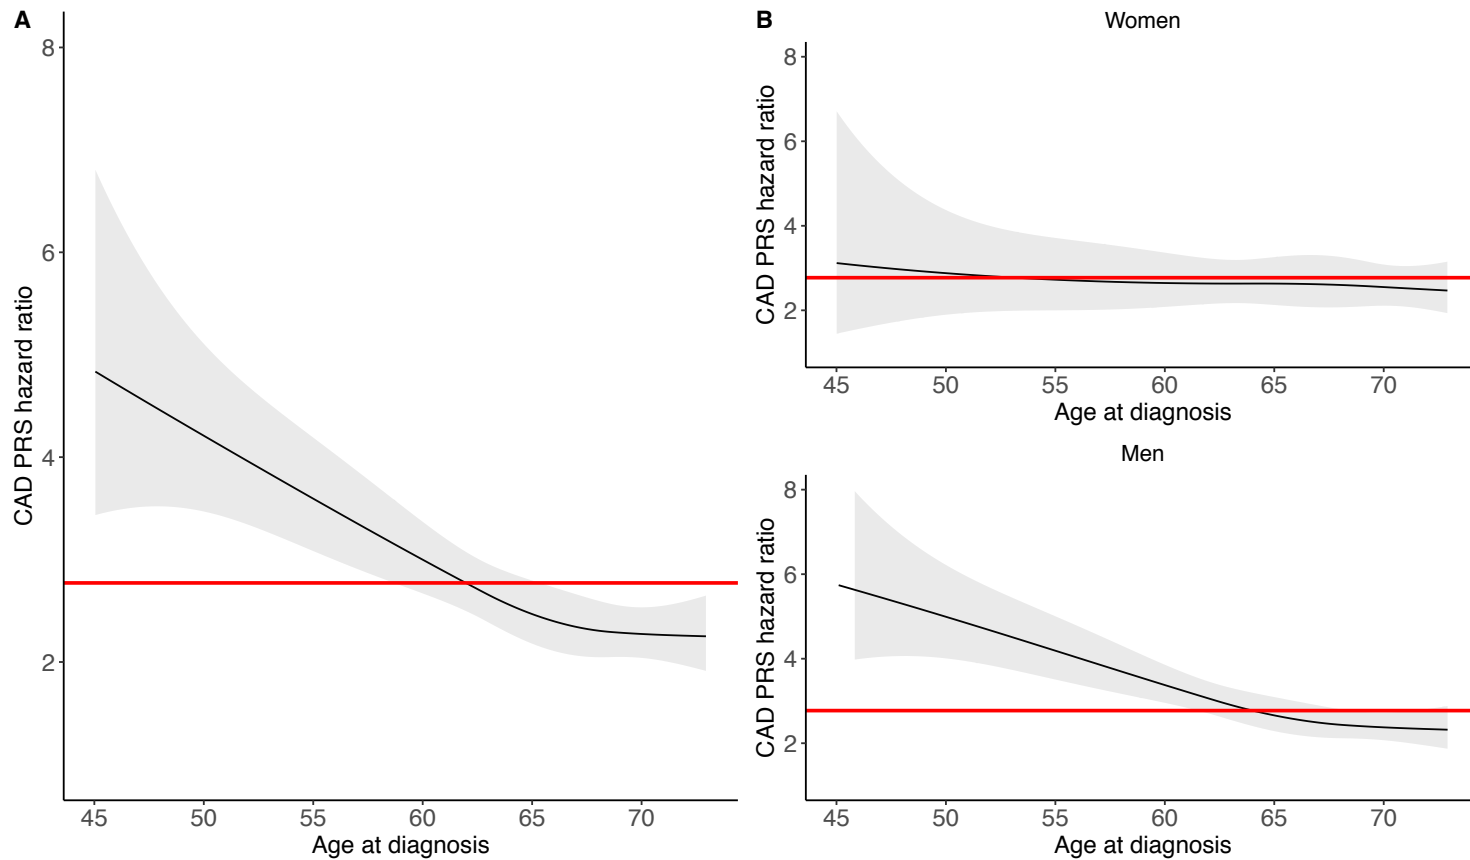

# Figure S3

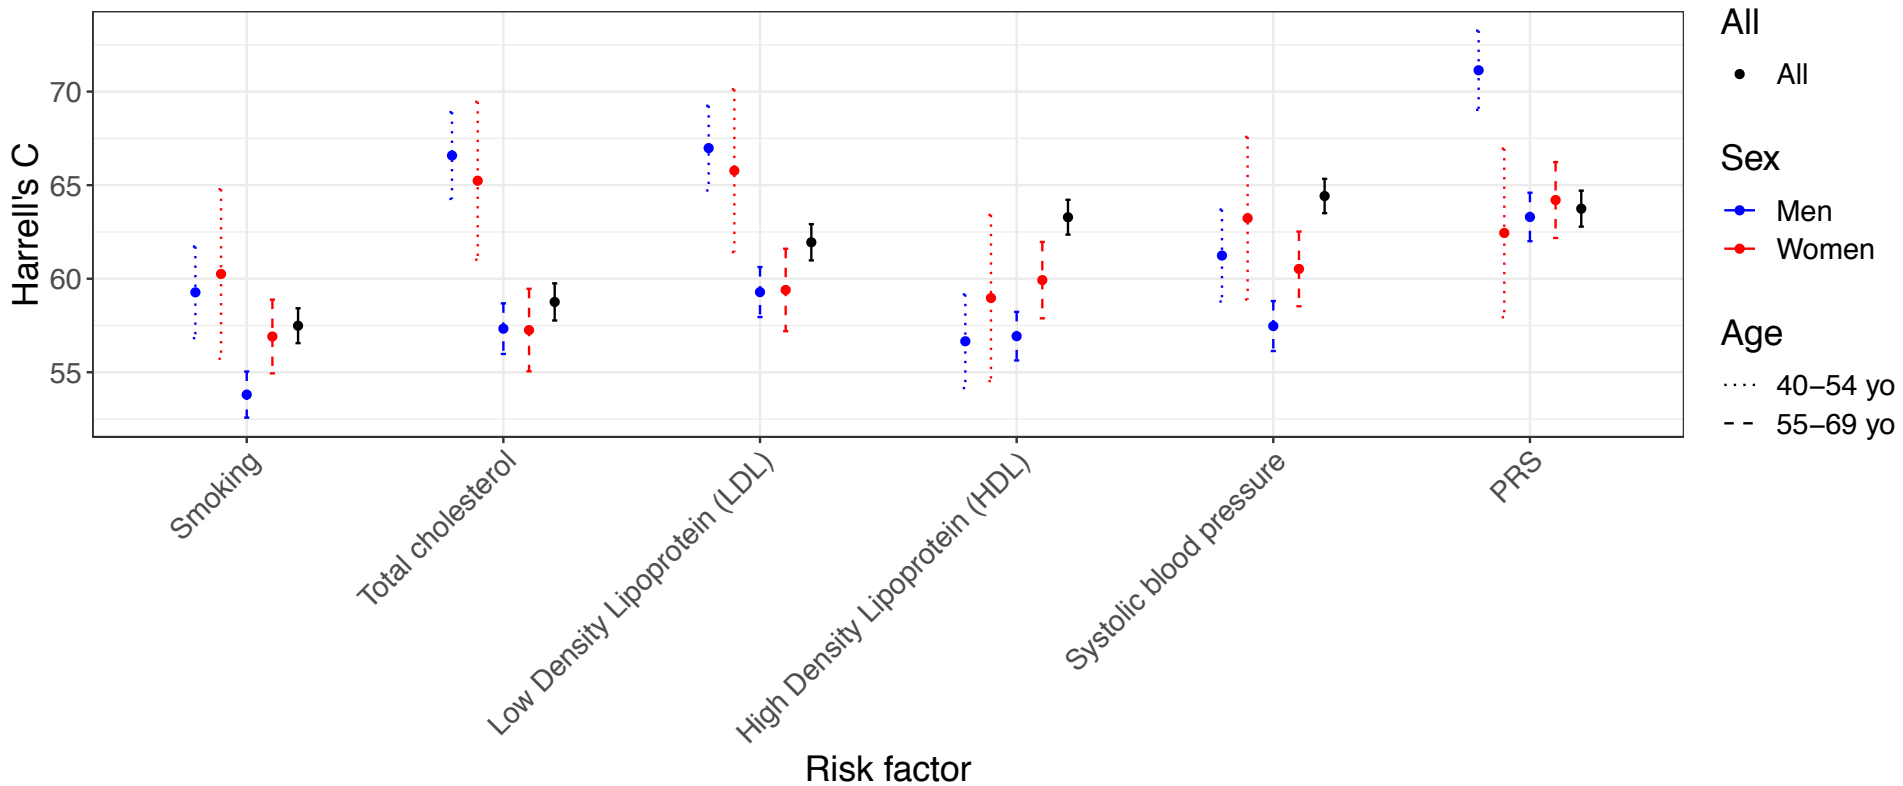

# Figure S4

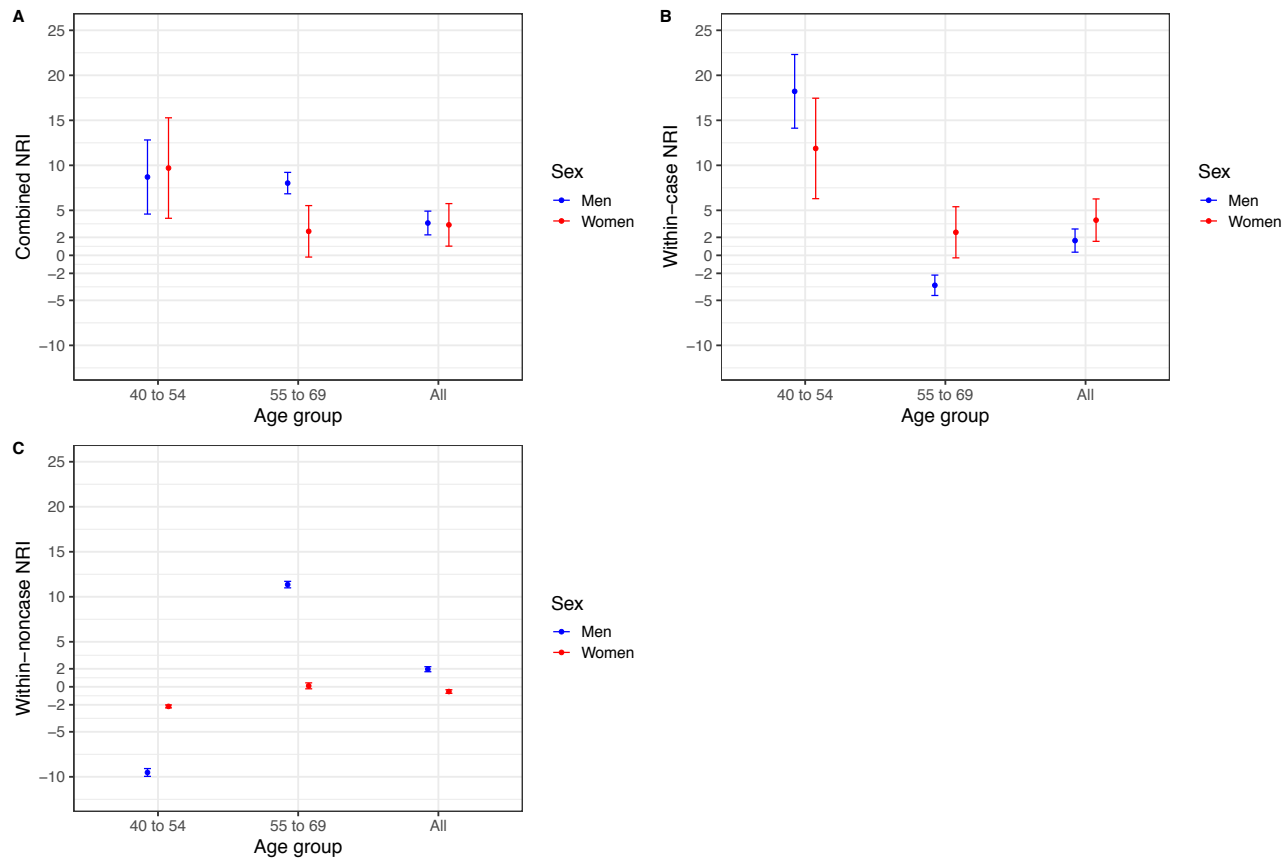

# Figure S5

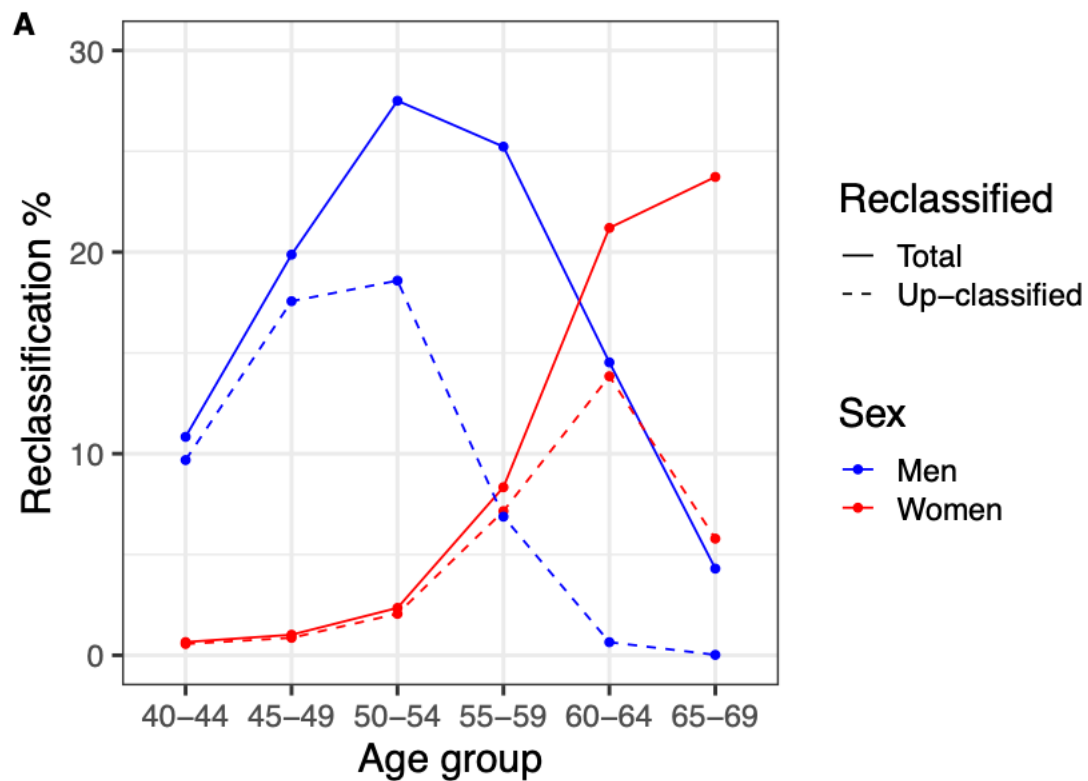



# Figure S6

**A** 40–54 yo

Predicted risk: Down-classified Shared low risk Shared high risk Up-classified

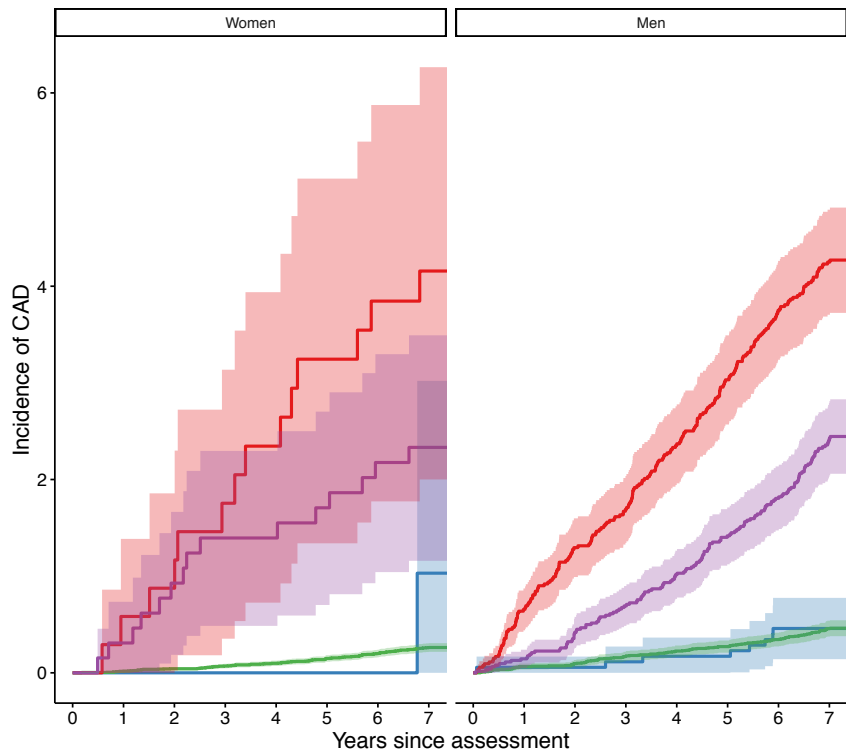

**B** 55–69 yo

Predicted risk: Down-classified Shared low risk Shared high risk Up-classified

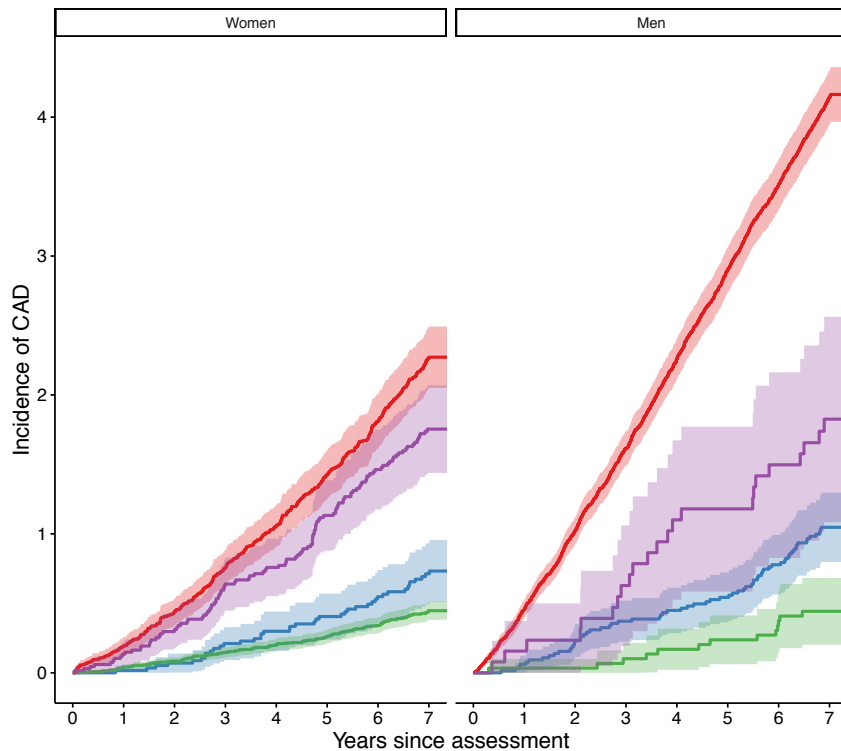

# Figure S7

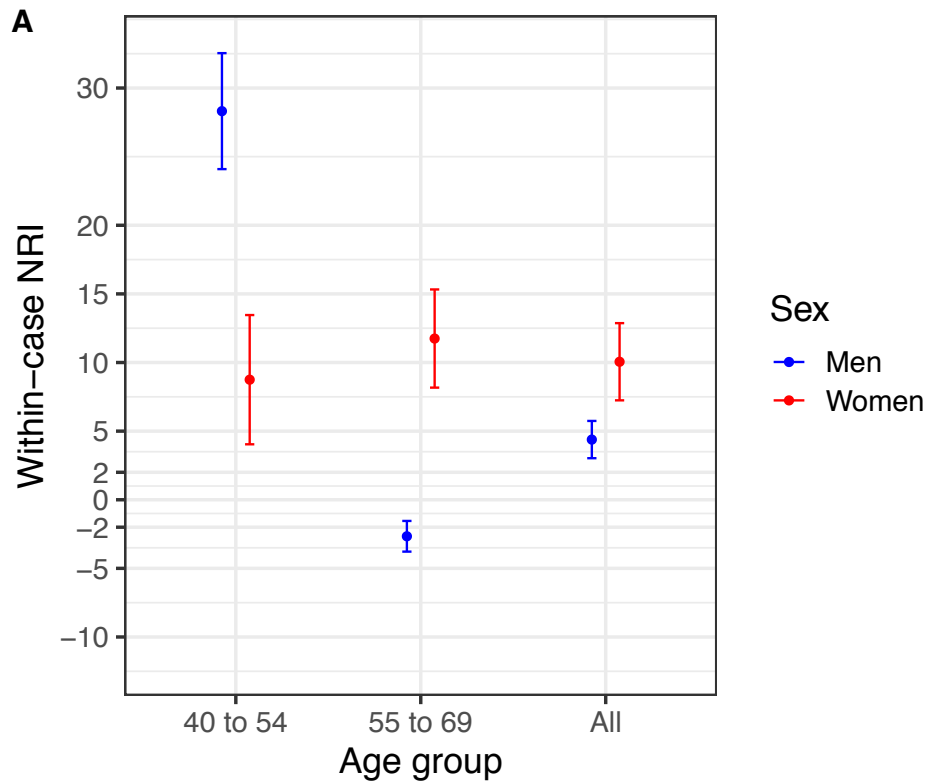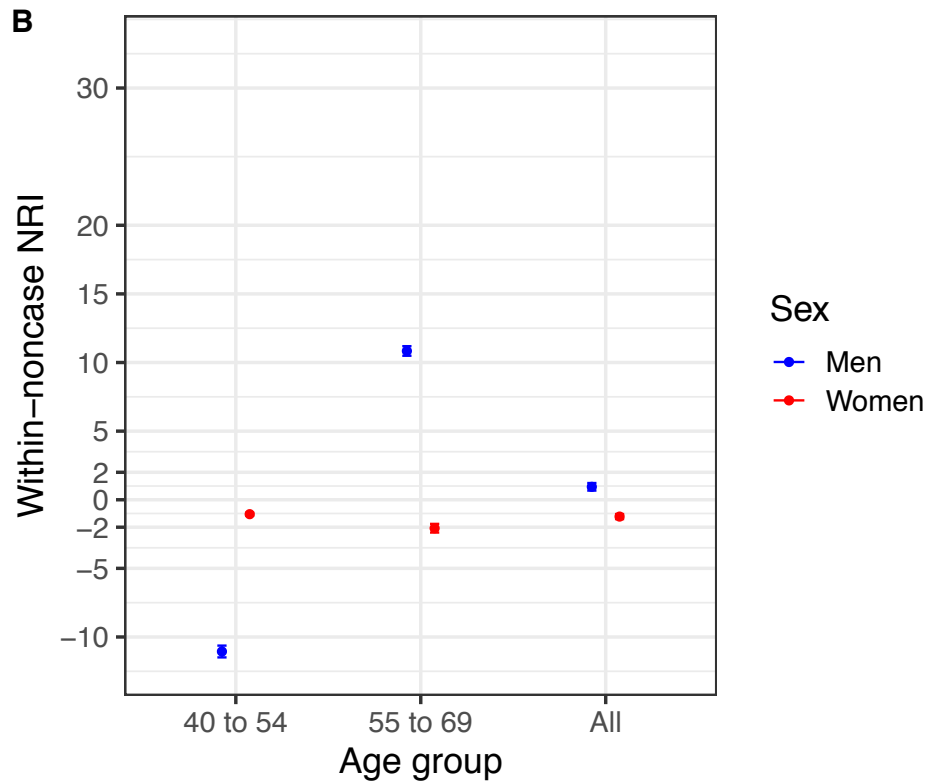

Supplement: Supplementary file [file 2020.06.01.20119297-1.pdf]
